# Supplementary material for: Biodistribution and radiation dosimetry of the novel hypoxia PET probe [18F]DiFA and comparison with [18F]FMISO
Source: Springer Nature journal article supplement (doi:10.1186/s13550-019-0525-6), 2019-07-05

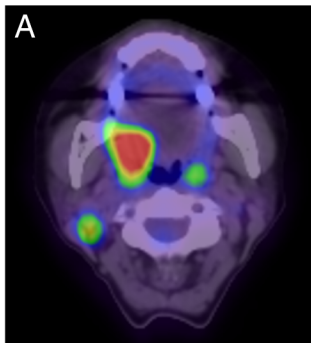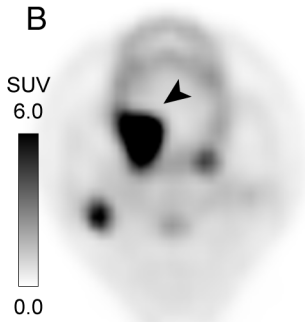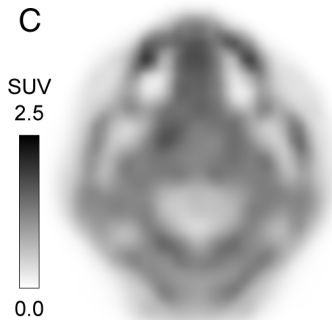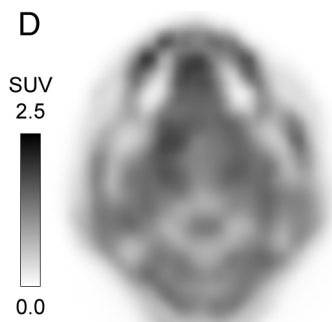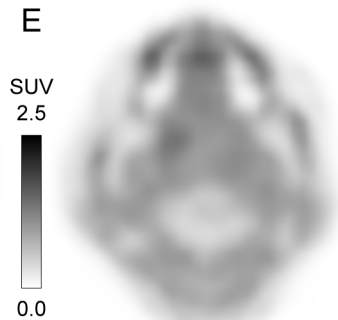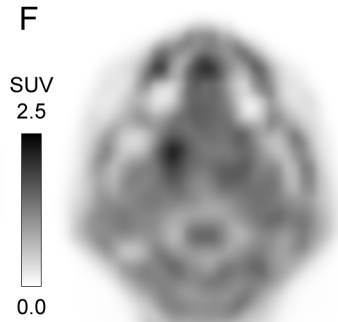

Supplement: MOESM4 [file 16901110]
